# Supplementary material for: Towards the Physiological Understanding of Yarrowia lipolytica Growth and Lipase Production Using Waste Cooking Oils
Source: MDPI journal article supplement (doi:10.3390/en15145217), 2022-07-19
Supplement: s1 [file s1]

## Supporting Information

# TOWARDS THE PHYSIOLOGICAL UNDERSTANDING OF *YARROWIA LIPOLYTICA* GROWTH AND LIPASE PRODUCTION BY USING WASTE COOKING OILS

Mattia Colacicco <sup>1†</sup>, Cosetta Ciliberti <sup>1†</sup>, Gennaro Agrimi <sup>1,2</sup>, Antonino Biundo <sup>1,\*</sup> and Isabella Pisano <sup>1,2,\*</sup>

<sup>1</sup> Department of Bioscience, Biotechnology and Biopharmaceutics, University of Bari, Via Edoardo Orabona, 4, 70125 Bari, Italy; e-mail@e-mail.com

<sup>2</sup> CIRCC, Interuniversity Consortium Chemical Reactivity and Catalysis, Via Celso Ulpiani, 27, 70126 Bari, Italy e-mail@e-mail.com

\* Correspondence: antonino.biundo@uniba.it; isabella.pisano@uniba.it Tel.: +390805442771

† These authors have equally contributed

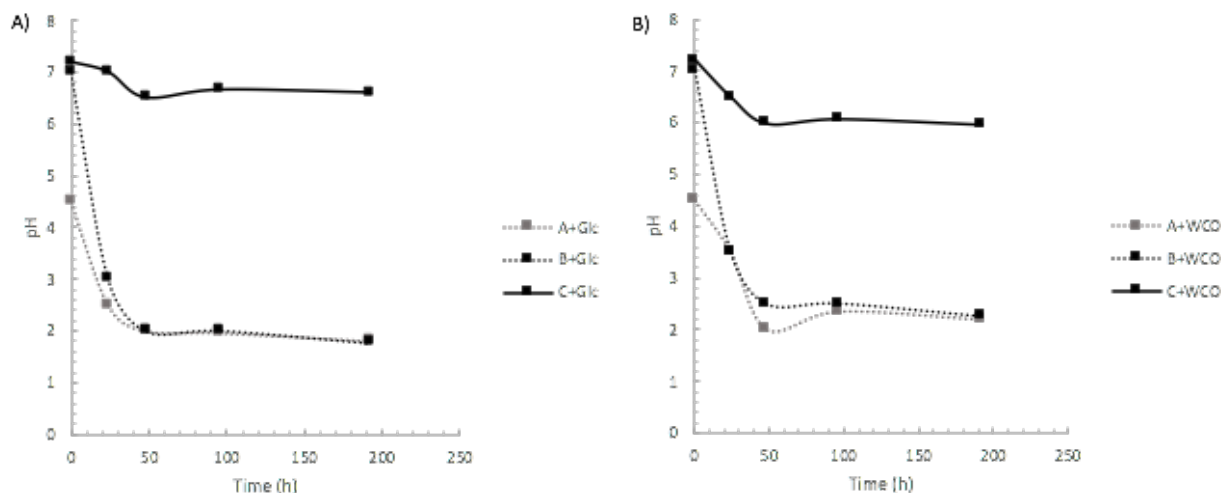

**Figure S1.** Analysis of pH change of small-scale cultures during time-course culture. Conditions A, B, C were tested in the presence of 3% *w v*<sup>-1</sup> glucose (Panel A) or 10% *v v*<sup>-1</sup> WCO (Panel B) for 216 h. Data represent a representative experiment (from three independent experiments) performed in a single run.
